# Supplementary material for: Chemical design of a smart chitosan–polypyrrole–magnetite nanocomposite toward efficient water treatment
Source: Royal Society of Chemistry journal article supplement (doi:10.1039/c4cp03062a), 2014-01-01
Supplement: c4cp03062a1.pdf [file c4cp03062a1.pdf]

### Supporting Information

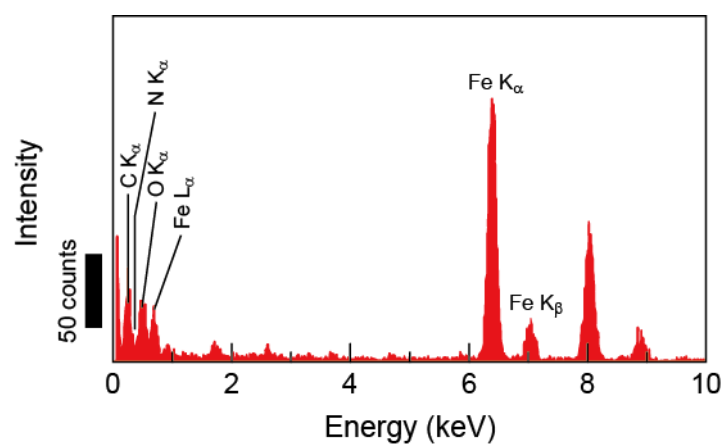

**Fig. S1** EDX spectrum of the obtained Cs/PPy/Fe<sub>2</sub>O<sub>3</sub> nanocomposite. Percentage of each component in the nanocomposite is shown in inset.

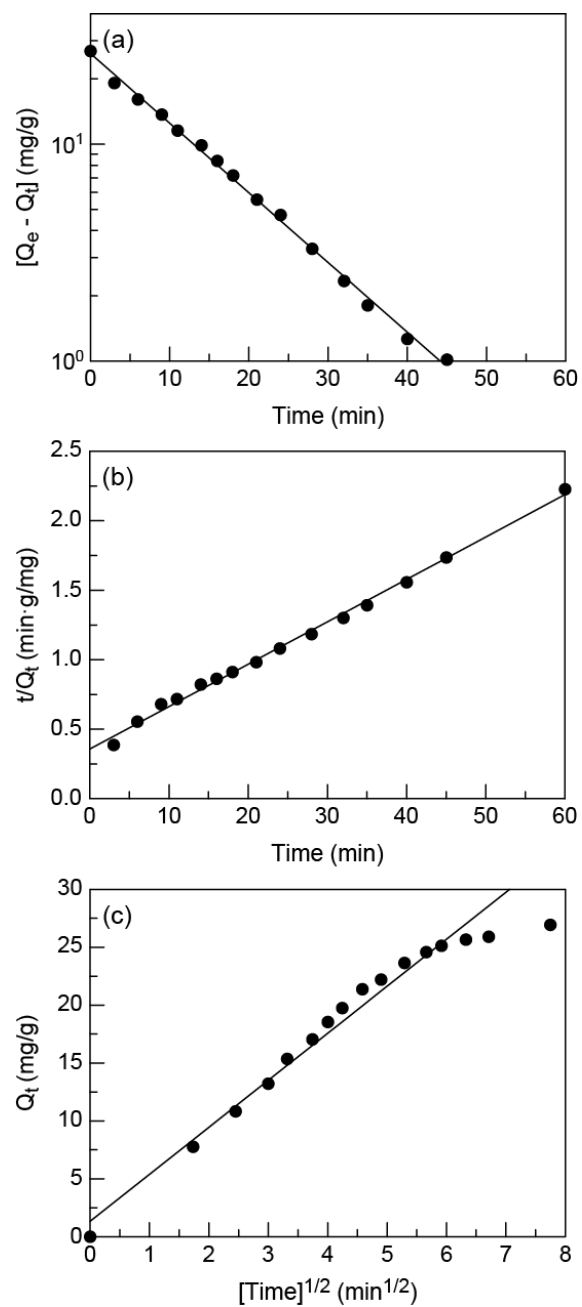

**Fig. S2** (a) Pseudo-first, (b) pseudo-second order, and (c) intraparticle diffusion kinetics of adsorption of AG by Cs/PPy/Fe<sub>3</sub>O<sub>4</sub> nanocomposite.

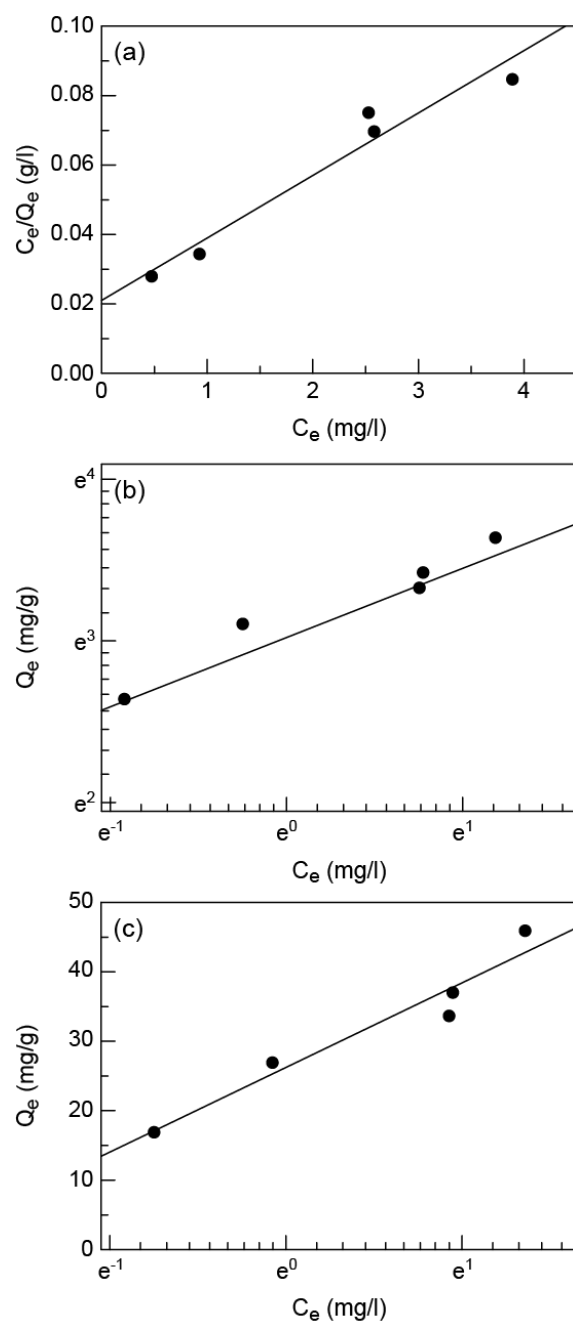

**Fig. S3** (a) Langmuir, (b) Freundlich, and (c) Temkin isotherms for the adsorption of AG by Cs/PPy/Fe<sub>3</sub>O<sub>4</sub> nanocomposite.
